# Supplementary material
Source: PubMed Central journal article supplement (PMC6615983)
Supplement: NIHMS1528762-supplement-1.pdf [file NIHMS1528762-supplement-1.pdf]

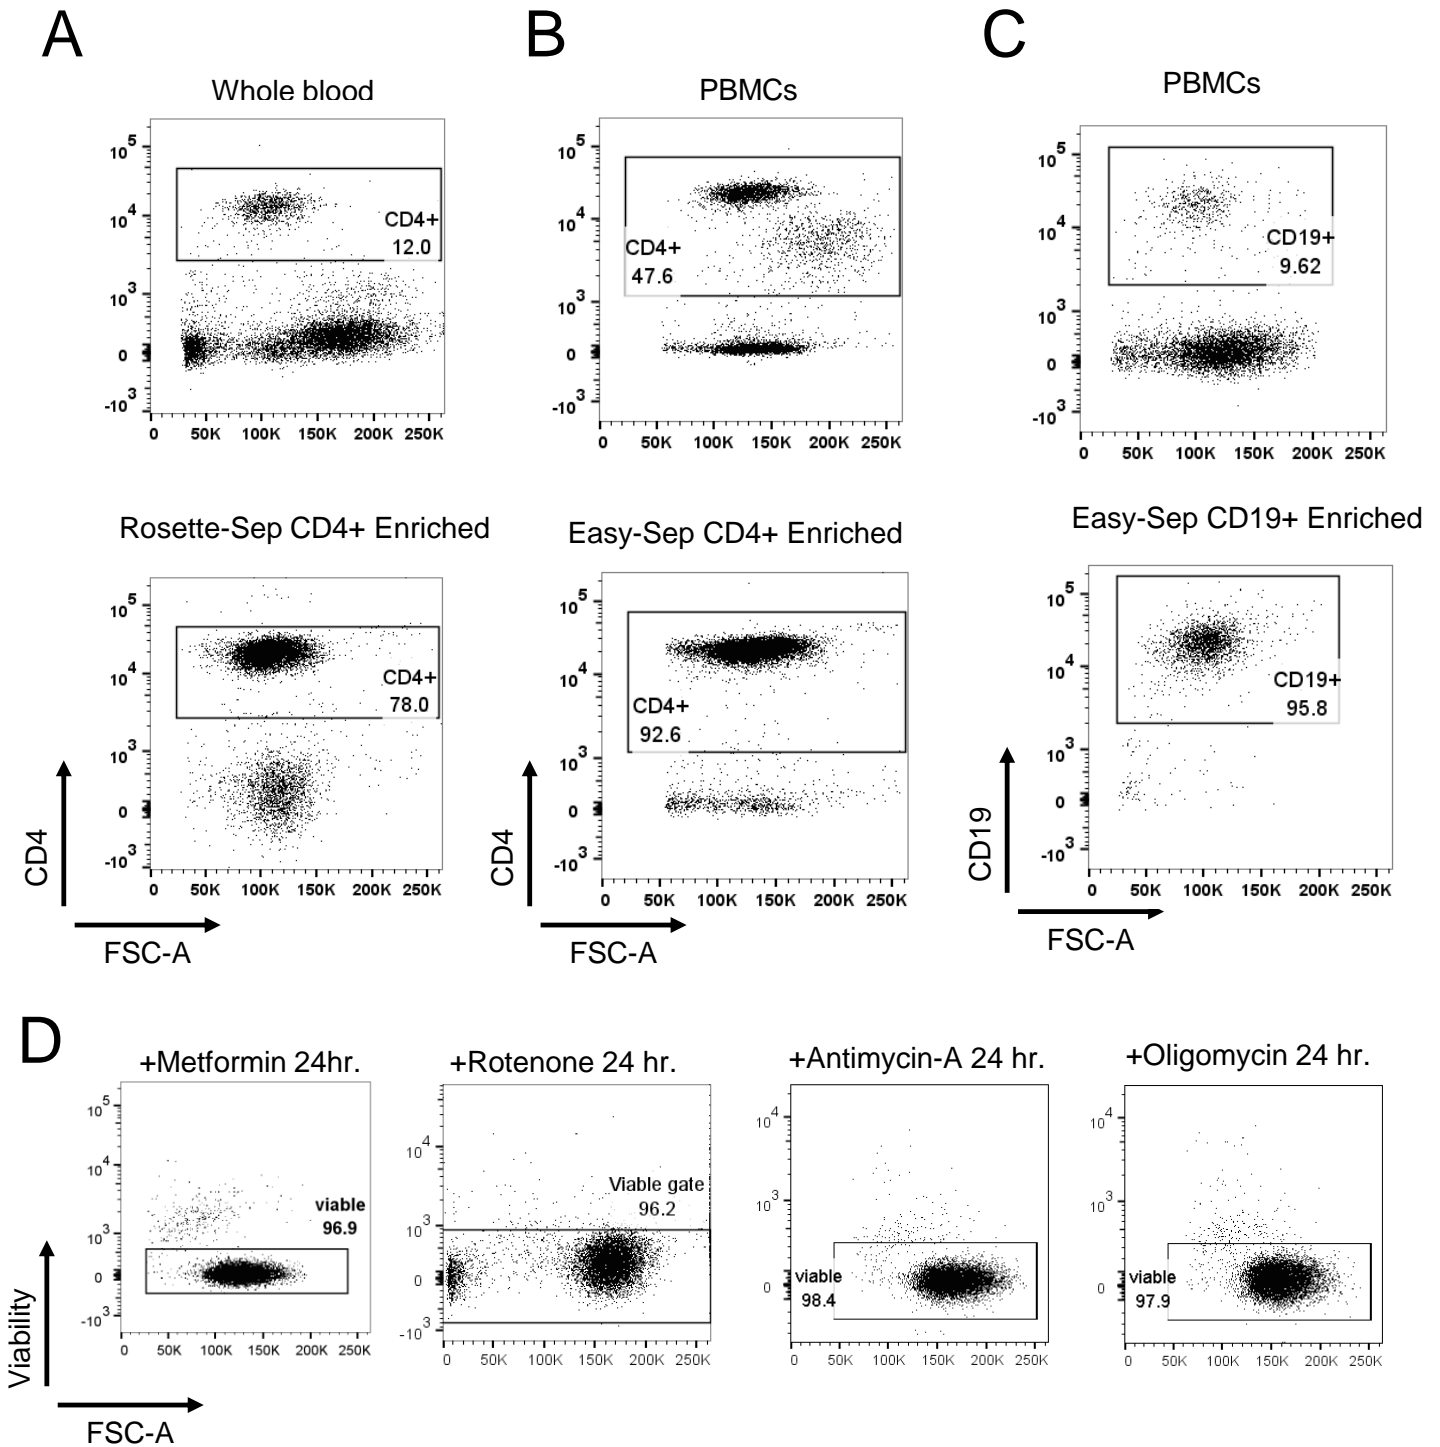

**Supplemental Figure 1.** Purity of CD4+ and CD19+ cell isolation and viability of CD4+ T cells after culture with metabolic inhibitor drugs. (A) Representative flow cytometry plots of whole blood before isolation and post-Rosette Sep CD4+ enrichment (B) Representative flow cytometry plots of PBMCs isolated by density centrifugation before isolation and post EasySep CD4+ enrichment (C) Representative flow cytometry plots of PBMCs isolated by density centrifugation before isolation and post CD19+ enrichment. (D) Representative viability stain of HD CD4+ T cells stimulated with anti-CD3 $\epsilon$ /anti-CD28 and treated for 24 h with 2 mM metformin or 100nM of either rotenone, antimycin-a, or oligomycin.

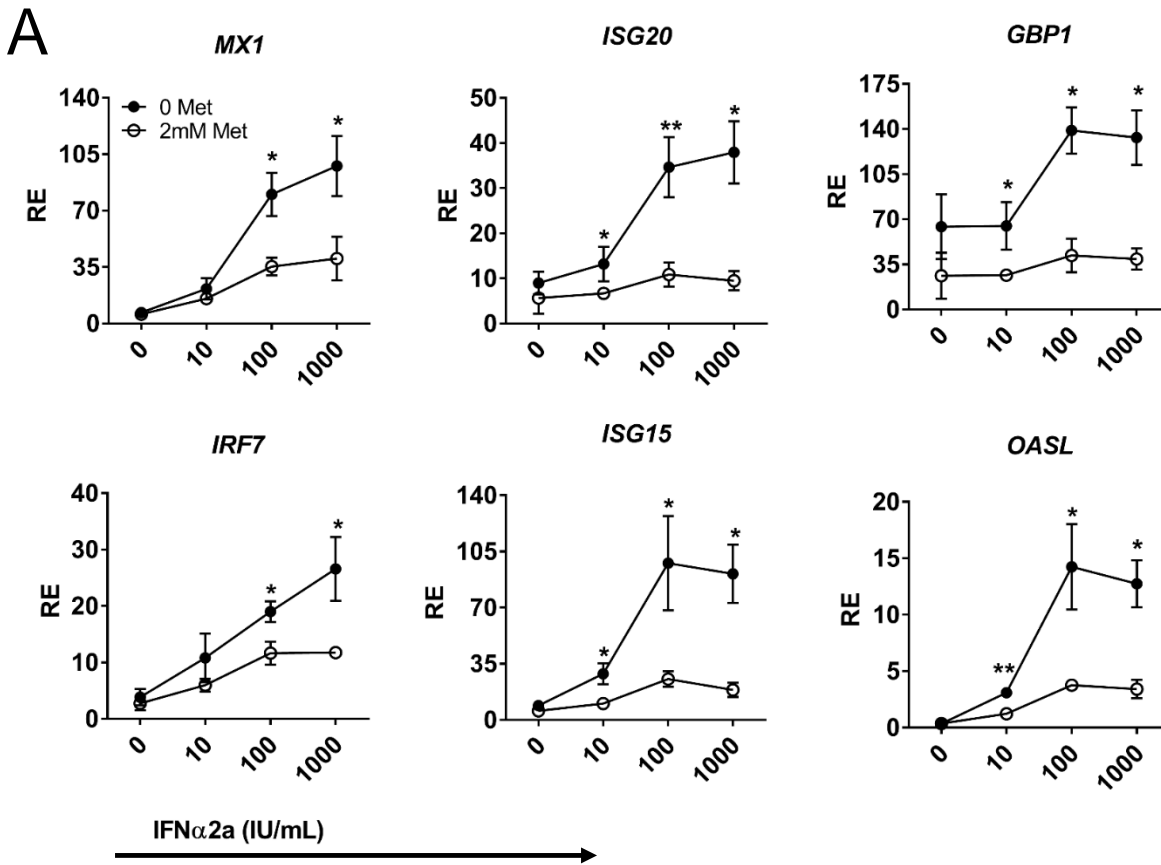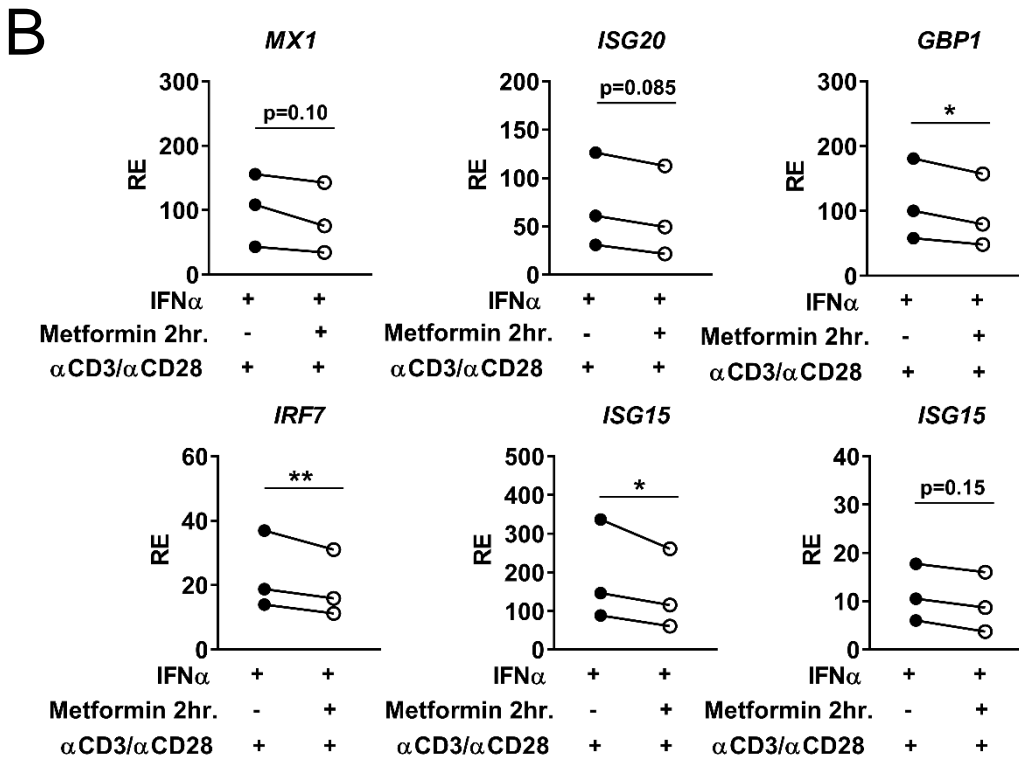

**Supplemental Figure 2.** IFN $\alpha$ 2a dose titration in HD CD4<sup>+</sup> T cells and 2 h metformin co-treatment. **(A)** 3 concentrations of IFN $\alpha$  were tested in CD4<sup>+</sup> T cells stimulated with anti-CD3 $\epsilon$ /anti-CD28 with or without metformin for 24 h and treated with recombinant IFN $\alpha$ 2a for the final 2 h (1 IU = 4 pg/mL). The graphs show means and standard deviation of three technical replicates. **(B)** Effect of 2 h metformin and IFN $\alpha$ 2a co-treatment on the expression of 6 ISG genes in HD CD4<sup>+</sup> T cells (N = 3). Paired t-tests used for (A, B). \*  $p < 0.05$ , \*\*  $p < 0.01$ .

**Supplemental Table 1.** Primer sequences for gene expression studies and ChIP assays.

| <b>qRT-PCR Gene</b> | <b>Sequence</b>        | <b>Product (bp)</b> |
|---------------------|------------------------|---------------------|
| <i>MX1</i> F        | AGGCAAGGTCAGTTACCAGG   | 89                  |
| <i>MX1</i> R        | CGATGGCATTCTGGGCTTTATT |                     |
| <i>ISG20</i> F      | CACAAGAGCATCCAGAACAGC  | 63                  |
| <i>ISG20</i> R      | CATCGTTGCCCTCGCATCTT   |                     |
| <i>GBP1</i> F       | GGCTATGGACCAACTGTACTAT | 215                 |
| <i>GBP1</i> R       | TCAGCTTCAGGGAGTATGTCAG |                     |
| <i>IRF7</i> F       | GAGTCTTCTTCCAAGAGCTGGT | 68                  |
| <i>IRF7</i> R       | GATGGTATAGCGTGGGGAGC   |                     |
| <i>ISG15</i> F      | GAGAGGCAGCGAACTCATCT   | 157                 |
| <i>ISG15</i> R      | CTTCAGCTCTGACACCGACA   |                     |
| <i>OASL</i> F       | GAAGGTAGTCAAGGTGGGCTC  | 163                 |
| <i>OASL</i> R       | CTGGCTTTGCCACATGGTTT   |                     |
| <i>PPIA</i> F       | AGCTGTTTACCCCTGATCGTG  | 71                  |
| <i>PPIA</i> R       | CCTTGTCTGCAAACAGAAGGC  |                     |
| <i>HMBS</i> F       | AGAATGAAGTGGACCTGGTTGT | 81                  |
| <i>HMBS</i> R       | AGATGGCTCCGATGGTGAAG   |                     |
| <b>ChIP Target</b>  | <b>Sequence</b>        | <b>Product (bp)</b> |
| MX1 promoter 1 F    | CCACACGCACAGAAGAGGAA   | 141                 |
| MX1 promoter 1 R    | TGCATTTCTGCAAGTCCGT    |                     |
| MX1 promoter 2 F    | CCAGGAGCTAGGTTTCGTTT   | 118                 |
| MX1 promoter 2 R    | GCTCTCGCTTCGCCTCTT     |                     |
| ISG15 promoter 1 F  | TACTGCCCTAAACCGAGTGT   | 178                 |
| ISG15 promoter 1 R  | TATCGCGCATTCCAGATCCTT  |                     |
| ISG15 promoter 2 F  | CGCCACTTTTGCTTTTCCCT   | 88                  |
| ISG15 promoter 3 R  | TTCGGTTTCCCTTCCCGAG    |                     |
| Gene Desert 2 F     | AGGAGACACCTTGACTCCCAT  | 126                 |
| Gene Desert 2 R     | ACTGATCACGGGGTTACAGC   |                     |
